# Supplementary material for: Therapeutic efficacy of antibodies and antivirals against a SARS-CoV-2 Omicron variant
Source: Research Square preprint supplement (doi:10.21203/rs.3.rs-1240227/v1), 2022-01-19
Supplement: Supplementary file 1 [file 009a472baca99b71bdc3346b.docx]

| **Supplementary Table 1. Efficacy of monoclonal antibodies and antiviral compounds against SARS-CoV-2 Omicron-R346K variant *in vitro*** | | | | | | | | |
| --- | --- | --- | --- | --- | --- | --- | --- | --- |
| WHO label (Pango lineage) | Virus | Neutralization activity of monoclonal antibodies | | | | | | |
| FRNT50 (ng/ml) * | | | | | | |
| S309 | REGN10987 | REGN10933 | COV2-2196 | COV2-2130 | REGN10987/ REGN10933 | COV2-2196/ COV2-2130 |
| Omicron (B.1.1.529)-R346K | hCoV-19/Japan/NC929-1N/2021 (NC929) | 384.52 ± 65.98 | >50,000 | 11998.94 ± 2604.70 | 880.47 ± 68.08 | 13558.20 ± 4646.95 | >10,000 | 1374.90 ± 14.47 |

| *FRNT50: 50% focus reduction neutralization titer. |
| --- |
