# Supplementary material for: Therapeutic efficacy of antibodies and antivirals against a SARS-CoV-2 Omicron variant
Source: Research Square preprint supplement (doi:10.21203/rs.3.rs-1240227/v1), 2022-01-19
Supplement: Supplementary file 2 [file 2f365edc16372a1fb28ea7b8.docx]

**Supplementary Table 3. Pharmacokinetic parameters of S-217622 in plasma after single oral administration to hamsters at 60 mg/kg**

| Pharmacokinetic parameter | S-217622 in plasma |
| --- | --- |
| Mean ± SD |
| Cmax (µM) a | 128 ± 17 |
| Tmax (h) b | 1.88 ± 1.55 |
| t1/2,z (h) c | 3.43 ± 0.09 |
| AUC d0-24hr (µM·h) | 937 ± 68 |
| AUC0-inf (µM·h) | 945 ± 70 |

Data are expressed as the mean ± SD (n=4/group).

a: maximum concentration

b: Time of maximum concentration

c: t1/2, (4-24h)

d: area under the concentration–time curve
