# Supplementary material for: Therapeutic efficacy of antibodies and antivirals against a SARS-CoV-2 Omicron variant
Source: Research Square preprint supplement (doi:10.21203/rs.3.rs-1240227/v1), 2022-01-19
Supplement: Supplementary file 3 [file a464fac0f22044afb5700505.docx]

| **Supplementary Table 2. Virus sensitivity to S-217622 *in vitro*** |  |
| --- | --- |
| Virus | EC50 (μM)a |
| SARS-CoV-2/UT- NC002-1T/Human/2020/Tokyo (NC002) | 0.55 |
| hCoV-19/Japan/NC928-2N/2021 (Omicron; NC928) | 1.73 |
| aEC50 value: mean μM value of duplicate reactions. |  |
